# Supplementary material for: Liquid-liquid phase separation in organic particles containing one and two organic species: importance of the average O:C
Source: Copernicus journal article supplement (doi:10.5194/acp-2018-421), 2018-05-02
Supplement: Supplementary file 1 [file acp-2018-421-supplement.zip]

Archive with 12 entries (12 files):
- Movie S1. diethyl sebacate for decreasing RH.avi
- Movie S10. glyceryl tributyrate_polyethylene glycol-400 for increasing RH.avi
- Movie S11. diethyl sebacate_polyethylene glycol-400 for increasing RH.avi
- Movie S12. Polypropylene glycol_polyethylene glycol-400 for increasing RH.avi
- Movie S2. Glyceryl tributyrate for decreasing RH.avi
- Movie S3. suberic acid monomethyl ester for decreasing RH.avi
- Movie S4. diethyl sebacate for increasing RH.avi
- Movie S5. Glyceryl tributyrate for increasing RH.avi
- Movie S6. suberic acid monomethyl ester for increasing RH.avi
- Movie S8. diethyl sebacate_polyethylene glycol-400 for decreasing RH.avi
- Movie S9. Polypropylene glycol_polyethylene glycol-400 for decreasing RH.avi
- SI_LLPS in one and two organics_Song_submitted.pdf
