# Supplementary material for: Liquid-liquid phase separation in organic particles containing one and two organic species: importance of the average O:C
Source: Copernicus journal article supplement (doi:10.5194/acp-2018-421), 2018-05-02
Supplement: Supplementary file 1 [file acp-2018-421-supplement.zip › SI_LLPS in one and two organics_Song_submitted.pdf]

*Supplementary of*

## **Liquid-liquid phase separation in organic particles containing one and two organic species: importance of the average O:C**

**Mijung Song et al.,**

Correspondence to: A. K. Bertram (bertram@chem.ubc.ca)

### **S1. Calculation of average O:C of particles containing two organic species**

The average O:C of particles containing two organic compounds was calculated using the following equation (Song et al., 2012):

$$O:C = \frac{\frac{mf_1 \times O_1 + mf_2 \times O_2}{MW_1} + \frac{mf_1 \times C_1 + mf_2 \times C_2}{MW_2}}{\frac{mf_1 \times C_1 + mf_2 \times C_2}{MW_1} + \frac{mf_1 \times O_1 + mf_2 \times O_2}{MW_2}} \quad (1)$$

where  $MW_1$  and  $MW_2$  refer to the molecular weight of organic species 1 and 2, respectively;

$mf_1$  and  $mf_2$  refer to the mass fraction of organic species 1 and 2 in the mixture in the absence of water; and  $O_1$  and  $O_2$  refer to number of oxygen atoms in organic species 1 and 2; and  $C_1$  and  $C_2$  refer to the number of carbon atoms in organic species 1 and 2, respectively.

### **S2. Liquid-liquid phase separation in two organic species**

Humidity cycles were performed with particles containing two organic species. Results for increasing RH and decreasing RH are summarized in Table S1.

Table S1. Summary of studies with particles containing two organic species.  $LLPS_{lower}$  represents the lower boundary of the liquid-liquid phase separation determined from experiments with increasing RH and decreasing RH.  $LLPS_{upper}$  represents the upper boundary of the liquid-liquid phase separation determined from the experiments with increasing RH and

1 decreasing RH. Uncertainties represent  $2\sigma$  of multiple measurements and the uncertainty from  
2 the calibration. “No LLPS” indicates that only one phase was observed for the full range of  
3 relative humidity (RH) explored (approximately 0 to 100 % RH). Average O:C of the mixtures  
4 containing two organic species are also included.

| Mixtures                                                  | Average<br>O:C | Increasing RH         |                       | Decreasing RH         |                       |
|-----------------------------------------------------------|----------------|-----------------------|-----------------------|-----------------------|-----------------------|
|                                                           |                | LLPS <sub>lower</sub> | LLPS <sub>upper</sub> | LLPS <sub>lower</sub> | LLPS <sub>upper</sub> |
|                                                           |                | (%)                   | (%)                   | (%)                   | (%)                   |
| Diethyl sebacate, Propylene glycol                        | 0.33           | 92.4±2.1              | 100±2.0               | 91.5±2.3              | 100±2.0               |
| Diethyl sebacate, Glyceryl<br>tributyrate                 | 0.34           | 96.3±4.3              | 100±2.0               | 95.6±3.9              | 100±2.0               |
| Diethyl sebacate, Suberic acid<br>monomethyl ester        | 0.36           | 97.4±3.1              | 100±2.0               | 95.5±3.3              | 100±2.0               |
| Diethyl sebacate, Polyethylene<br>glycol-400              | 0.39           | 5.2±3.8               | 100±2.0               | 5.2±3.6               | 100±2.0               |
| Glyceryl tributyrate, Propylene<br>glycol                 | 0.39           | 93.8±2.3              | 100±2.0               | 93.1±2.9              | 100±2.0               |
| Propylene glycol, Suberic acid<br>monomethyl ester        | 0.42           | 97.7±2.3              | 100±2.0               | 96.8±2.1              | 100±2.0               |
| Glyceryl tributyrate, Suberic acid<br>monomethyl ester    | 0.42           | 97.6±3.4              | 100±2.0               | 96.7±2.4              | 100±2.0               |
| Propylene glycol, Polyethylene<br>glycol-400              | 0.47           | 73.9±2.5              | 89.9±3.0              | 74.4±2.4              | 89.3±2.2              |
| Glyceryl tributyrate, Polyethylene<br>glycol-400          | 0.47           | 16.0±2.3              | 100±2.0               | 15.9±2.6              | 100±2.0               |
| Diethyl sebacate, Diethyl L-<br>tartrate                  | 0.48           | 92.8±3.4              | 100±2.0               | 92.8±3.3              | 100±2.0               |
| Suberic acid monomethyl ester,<br>Polyethylene glycol-400 | 0.50           | 93.2±3.2              | 100±2.0               | 93.0±2.9              | 100±2.0               |
| Glyceryl tributyrate, Diethyl L-                          | 0.55           | 93.9±3.3              | 100±2.0               | 94.0±3.3              | 100±2.0               |

|                                                    |      |          |         |          |         |
|----------------------------------------------------|------|----------|---------|----------|---------|
| tartrate                                           |      |          |         |          |         |
| Polyethylene glycol-400, Diethyl L- tartrate       | 0.56 | No LLPS  |         | No LLPS  |         |
| Suberic acid monomethyl ester, Diethyl L- tartrate | 0.58 | 97.3±2.7 | 100±2.0 | 95.9±2.6 | 100±2.0 |
| Diethyl L- tartrate, Polyethylene glycol-400       | 0.68 | No LLPS  |         | No LLPS  |         |

1

## 2 **Reference**

3 Song, M., Marcolli, C., Krieger, U. K., Zuend, A., and Peter, T.: Liquid-liquid phase separation  
4 in aerosol particles: Dependence on O:C, organic functionalities, and compositional  
5 complexity, Geophys. Res. Lett., 39, Artn L19801, Doi 10.1029/2012gl052807, 2012.

6
